## Use of speckle-tracking echocardiography to stratify risk of atrial fibrillation-related stroke: comparison of left atrial and atrial appendage mechanics

Mao Y.<sup>1</sup>; Yang Y.<sup>1</sup>; Yu C.<sup>1</sup>; Ma MM.<sup>1</sup>; Wang YH.<sup>2</sup>; Jiang RH.<sup>2</sup>; Jiang CY.<sup>2</sup>

<sup>1</sup>Sir Run Run Shaw Hospital, School of Medicine, Zhejiang University, Diagnostic ultrasound and Echocardiography, Hangzhou, China

<sup>2</sup>Sir Run Run Shaw Hospital, School of Medicine, Zhejiang University, Department of Cardiology, Hangzhou, China

**Funding Acknowledgements:** Type of funding sources: Foundation. Main funding source(s): the National Natural Science Foundation of China

**onbehalf:** Sir Run Run Shaw Hospital,Zhejiang University,School of Medicine

**Background:** Left atrial (LA) and appendage (LAA) dysfunction were associated with increased risk of stroke in atrial fibrillation. However, usefulness of LA and LAA mechanics has not been fully compared. **Methods:**201 AF patients were prospectively enrolled. 42(20.8%) had previous stroke/TIA. Speckle tracking was used to measure LA and LAA peak positive strain. LA and LAA MD was defined as the SD of time to peak positive strain corrected by the R-R interval. **Results:**LA MD and LAA MD were independently associated with stroke/TIA. The model based on CHA2DS2-VASc score for discrimination of stroke was significantly improved by adding LA MD or LAA MD (P < 0.01). Diagnostic value of LA MD was better than LAA MD in patients with normal LA volumes, while LAA MD was more useful in patients with LA enlargement. **Conclusion:**Both LA and LAA mechanics had incremental value over CHA2DS2VASc score. However, priorities of strain assessment depend on patients' LA volume.

| Variables                   | Univariate analysis |         | Multivariate analysis  |                    |                        |                    |                        |                    |
|-----------------------------|---------------------|---------|------------------------|--------------------|------------------------|--------------------|------------------------|--------------------|
|                             | OR (95% CI)         | P value | Model 1<br>OR (95% CI) | Model 1<br>P value | Model 2<br>OR (95% CI) | Model 2<br>p value | Model 3<br>OR (95% CI) | Model 3<br>P value |
| <b>Clinical parameters</b>  |                     |         |                        |                    |                        |                    |                        |                    |
| Age                         | 1.09(1.04-1.14)     | <0.001  | 1.11(1.04-1.17)        | 0.001              | 1.11(1.05-1.17)        | 0.001              | 1.11(1.04-1.17)        | 0.001              |
| BMI                         | 0.988(0.89-1.10)    | 0.84    | 1.07(0.92-1.25)        | 0.40               | 1.07(0.91-1.25)        | 0.40               |                        |                    |
| CHA2DS2-VASc score          | 1.52(1.15-2.00)     | 0.003   | 1.08(0.67-1.74)        | 0.76               | 1.08(0.65-1.80)        | 0.77               | 1.10(0.69-1.76)        | 0.69               |
| Persistent AF               | 1.88(0.94-3.74)     | 0.07    | 0.75(0.23-2.40)        | 0.63               | 0.87(0.27-2.81)        | 0.82               |                        |                    |
| Therapeutic anticoagulation | 0.56(0.28-1.11)     | 0.10    | 0.22(0.09-0.57)        | 0.002              | 0.23(0.09-0.59)        | 0.002              | 0.22(0.09-0.57)        | 0.002              |
| <b>LA parameters</b>        |                     |         |                        |                    |                        |                    |                        |                    |
| LA EF                       | 0.96(0.94-0.99)     | 0.002   | 0.982(0.953-1.01)      | 0.26               |                        |                    |                        |                    |
| iLAVmin                     | 1.03(1.01-1.05)     | 0.006   | 0.98(0.94-1.02)        | 0.27               |                        |                    |                        |                    |
| LA MD                       | 1.22(1.10-1.36)     | <0.001  | 1.16(1.02-1.32)        | 0.02               | 1.18(1.03-1.34)        | 0.02               | 1.16(1.02-1.32)        | 0.02               |
| LA GLS                      | 0.935(0.893-0.98)   | 0.005   | 1.0(0.953-1.14)        | 0.36               | 1.02(0.94-1.12)        | 0.59               | 1.02(0.94-1.10)        | 0.72               |
| <b>LAA parameters</b>       |                     |         |                        |                    |                        |                    |                        |                    |
| LAA EF                      | 0.12(0.02-0.74)     | 0.02    |                        |                    | 3.34(0.31-36.06)       | 0.32               |                        |                    |
| LAA GLS                     | 0.98(0.96-1.00)     | 0.06    |                        |                    | 1.01(0.98-1.04)        | 0.65               |                        |                    |
| LAA dense SEC/thrombus      | 0.85(0.77-0.94)     | 0.001   | 0.96(0.86-1.07)        | 0.46               | 0.97(0.87-1.08)        | 0.59               | 0.96(0.87-1.06)        | 0.44               |
| LAA MD                      | 3.12(1.39-6.99)     | 0.006   |                        |                    | 2.02(0.75-5.45)        | 0.167              |                        |                    |
| LAA MD                      | 1.19(1.09-1.29)     | <0.001  | 1.19(1.08-1.31)        | 0.001              | 1.19(1.08-1.31)        | 0.001              | 1.19(1.08-1.31)        | 0.001              |

Univariable and multivariable logistic regression analyses of associations between clinical and echocardiographic covariates with stroke  
Abstract Figure.

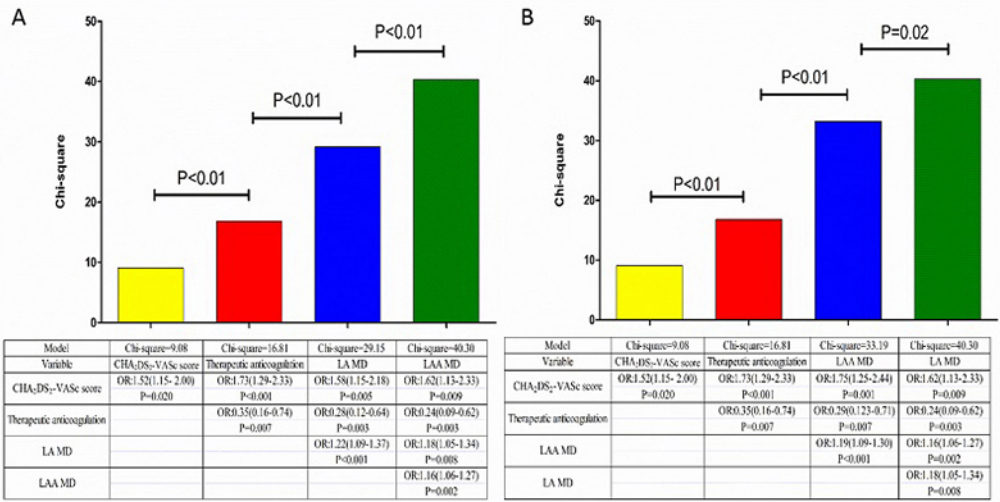

Source: http://academic.oup.com/ehjcimaging/article-pdf/22/Supplement_1/jeaa356.088/36214316/jeaa356.088.pdf
